# Supplementary material
Source: publisher site journal article supplement (https://www.spandidos-publications.com/1556/downloadSupplementary)
Supplement: Supplementary file 1 [file downloadSupplementary]

## Sheet: Sheet1
Table SII. Differentially expressed genes between metastatic and non- metastatic tumor samples.
Gene	logFC	logCPM	P-value	FDR
CYP2B6	8.4515	1.92748	2.22634e-13	1.47748e-09
NPPC	5.63024	1.41552	4.49364e-14	8.94639e-10
RHPN1	4.26793	5.73731	1.17325e-13	1.16791e-09
LEFTY1	4.51861	1.33949	3.12288e-13	1.55434e-09
RHPN1-AS1	4.18789	2.33448	1.88747e-12	7.51551e-09
SAA1	6.96504	6.53852	6.35975e-11	1.76009e-07
SLC15A1	5.61304	-0.582848	7.07253e-11	1.76009e-07
HYDIN	4.14728	1.7947	7.07047e-11	1.76009e-07
SAA2	7.3046	4.40248	1.76483e-10	3.904e-07
ITLN1	5.45285	0.75227	2.2549e-10	4.48929e-07
FOXJ1	4.3465	1.37868	3.78012e-10	6.84168e-07
OTUD1	2.71004	5.79265	1.27971e-09	2.12314e-06
SPINK5	4.13015	4.09395	1.03717e-08	1.58839e-05
MSLN	4.96506	3.2478	1.34521e-08	1.91298e-05
WNT11	2.48117	3.7761	5.1497e-08	6.83503e-05
SLC6A18	6.02863	-0.776808	6.45447e-08	8.03138e-05
KIAA2022	3.32942	-0.117899	7.32859e-08	8.58264e-05
ESPN	3.2247	2.17723	8.72962e-08	9.65544e-05
LRRC36	3.01415	1.79966	1.84049e-07	0.000192854
CDH16	4.13775	-1.61009	2.20734e-07	0.000209266
SMPDL3B	3.00329	0.889127	2.17032e-07	0.000209266
GAGE12J	7.65176	-1.58361	2.48088e-07	0.000224508
BTG2	2.92258	7.52698	2.73684e-07	0.000236903
C2CD4C	2.74818	1.08804	3.02311e-07	0.000240748
SCRG1	-5.51515	3.66714	2.97492e-07	0.000240748
METTL21C	5.6463	-1.07754	3.61715e-07	0.000276977
TMEM190	3.395	-1.13103	4.41106e-07	0.000325259
CDHR1	3.13867	0.569957	4.67441e-07	0.000332367
SRD5A2	3.20238	-0.314636	6.61889e-07	0.000454398
ARHGAP36	3.88836	0.686974	7.26928e-07	0.000468983
FAM155B	3.49379	0.0986636	7.30246e-07	0.000468983
KLK7	4.36443	-1.6837	7.74864e-07	0.000482087
LINC00837	5.51095	1.86053	8.39799e-07	0.000495819
PKHD1L1	3.92856	0.727117	8.71649e-07	0.000495819
C11orf92	2.3796	1.18009	8.71503e-07	0.000495819
LOC100130705	2.58267	2.97432	1.14743e-06	0.00063456
DNAAF1	2.90624	-1.00216	1.24496e-06	0.00066989
SHISA8	3.38549	-1.13754	1.37931e-06	0.00070412
SLC15A2	2.05271	3.26139	1.36723e-06	0.00070412
EDN2	3.91516	-0.939962	1.47632e-06	0.0007348
OR52E2	5.98755	-1.83322	1.74188e-06	0.000825694
ALOX15	3.35598	-0.786209	1.70794e-06	0.000825694
VSIG1	3.4721	1.00534	1.81965e-06	0.000842498
ACOXL	2.7376	0.375617	1.99502e-06	0.000902699
LIPH	3.23507	1.37139	2.35314e-06	0.00104108
ESRP1	3.55541	2.0327	2.40937e-06	0.00104279
PIK3C2G	4.00334	-1.12517	2.67629e-06	0.00113367
LGI3	3.56187	2.20886	3.0413e-06	0.00121846
FAM83B	3.15119	-0.092381	3.02956e-06	0.00121846
FGFR4	2.69451	3.53579	3.06006e-06	0.00121846
RRAD	3.76813	6.99777	3.28065e-06	0.00125287
LAMP3	3.50864	4.99862	3.33528e-06	0.00125287
CCDC37	2.6048	-1.19483	3.2584e-06	0.00125287
C9orf152	3.40752	0.183161	3.50297e-06	0.00129149
TMC5	3.30397	1.67717	4.28163e-06	0.00154987
GGT6	4.49232	-0.217156	4.37602e-06	0.00155575
NCMAP	3.37186	-0.356238	4.66643e-06	0.0016299
AQP3	2.27419	3.75054	5.03735e-06	0.00172911
CACNA2D2	2.63229	4.40284	5.65877e-06	0.0019095
FOXI2	2.97002	-0.0738484	5.95805e-06	0.0019544
PRRT4	2.24556	1.28476	5.98815e-06	0.0019544
UPK3B	4.10359	2.72468	6.38628e-06	0.00196021
C7	3.66714	5.4808	6.17478e-06	0.00196021
EHF	3.56102	2.39663	6.3998e-06	0.00196021
C3orf79	3.44746	-1.814	6.29098e-06	0.00196021
GLP2R	3.34701	-1.74993	7.10655e-06	0.00208436
LY6G6D	3.33721	-2.98706	7.27883e-06	0.00208436
ESRP2	3.20371	1.87833	6.98118e-06	0.00208436
ERBB3	3.17119	3.0364	7.32861e-06	0.00208436
C9orf171	2.98409	-2.18736	7.295e-06	0.00208436
PCDP1	3.02374	0.888428	7.81414e-06	0.00219115
RTKN2	2.97998	5.03881	8.25282e-06	0.00228202
SRPX	-1.60326	6.39181	8.48801e-06	0.0023149
LOC284276	3.13986	-1.09343	8.91712e-06	0.00239907
SPOCK2	2.64184	5.39613	9.16857e-06	0.00243383
S100A14	3.66208	2.22267	9.82089e-06	0.00253927
NKAIN1	3.05469	1.90443	9.76331e-06	0.00253927
OR12D2	4.59536	-3.0901	1.03252e-05	0.00260453
PYHIN1	2.43463	0.367418	1.03468e-05	0.00260453
CSPG5	1.99589	1.38399	1.04657e-05	0.00260453
MUC1	2.46592	5.00801	1.12865e-05	0.00270726
ENHO	2.46432	3.80807	1.12069e-05	0.00270726
ARHGEF26	1.8257	3.89911	1.10818e-05	0.00270726
LOC100128946	4.85638	-1.00648	1.15681e-05	0.00274178
ANXA3	2.85957	3.8898	1.20417e-05	0.00278765
MAPK15	2.43968	1.12998	1.19693e-05	0.00278765
PSAPL1	4.54707	-2.65697	1.27451e-05	0.00281414
SERPIND1	2.97669	-1.04399	1.23957e-05	0.00281414
PRODH	2.89002	3.10959	1.28629e-05	0.00281414
COLEC10	2.80217	-0.224675	1.25441e-05	0.00281414
BNIPL	2.14593	1.01713	1.28477e-05	0.00281414
TTLL10	2.62576	-1.48184	1.43635e-05	0.0031083
PLLP	2.39499	2.82099	1.46139e-05	0.00312847
ZBED2	4.03089	0.629847	1.50991e-05	0.00316449
MUC21	3.60472	-1.6853	1.5259e-05	0.00316449
RIMKLA	2.45701	1.63292	1.51896e-05	0.00316449
TNNI3	3.47938	0.617032	1.56202e-05	0.003206
CLDN4	3.33735	2.94211	1.6451e-05	0.00334207
FLJ37505	4.15622	-1.098	1.69641e-05	0.00340536
CDH1	3.61507	3.40893	1.71886e-05	0.00340536
TUBA4B	3.43713	-1.88201	1.74467e-05	0.00340536
CCDC108	2.90464	-0.903963	1.74328e-05	0.00340536
STOML3	3.95396	-2.28369	1.78359e-05	0.00344753
HAS3	2.15454	2.43911	1.81197e-05	0.00346871
WISP1	2.18387	8.24579	1.86318e-05	0.00353277
MACC1	2.52406	1.37967	1.99199e-05	0.00370641
TSPAN13	1.68947	5.6185	1.98968e-05	0.00370641
TACSTD2	2.97364	3.94457	2.04773e-05	0.00377483
ELF3	3.41631	2.61154	2.07544e-05	0.00379082
C19orf21	3.20833	1.21969	2.14295e-05	0.00381608
FAM198B	-1.76469	7.09154	2.14677e-05	0.00381608
KRT75	-6.25573	1.55518	2.12283e-05	0.00381608
SNX25	1.00446	4.83724	2.18196e-05	0.0038443
C9orf24	2.08147	-0.298318	2.28308e-05	0.00398718
USP26	4.84604	-3.16	2.38473e-05	0.00407215
DMBT1	3.71152	3.98872	2.434e-05	0.00407215
C16orf89	2.79301	3.44305	2.43258e-05	0.00407215
DCC	2.59545	0.985825	2.39633e-05	0.00407215
GPX3	1.85687	7.12408	2.41938e-05	0.00407215
PLCB4	1.59996	5.2722	2.52243e-05	0.00418493
GPRC5D	2.83814	-1.45873	2.59793e-05	0.00427456
PACSIN1	2.91296	0.560869	2.67389e-05	0.00436348
SERPINA9	3.52788	-1.71102	2.72437e-05	0.00440972
MAL2	3.23558	3.66691	2.78021e-05	0.00444385
AGER	2.99269	6.80484	2.7901e-05	0.00444385
GADD45B	1.59685	6.94922	2.81327e-05	0.00444518
SSTR4	3.07688	-1.46322	2.9562e-05	0.00463425
HPN	2.92761	1.61456	3.0004e-05	0.00466679
LDLRAD1	3.94391	-1.24039	3.12207e-05	0.0048184
OR2H1	4.3058	-3.16943	3.21096e-05	0.00484295
TMEM139	2.43661	0.721816	3.19068e-05	0.00484295
MXRA5	-2.351	9.18225	3.17699e-05	0.00484295
CLVS1	2.41302	-1.53239	3.32703e-05	0.00494312
HLA-DQA1	-2.64832	4.93055	3.31571e-05	0.00494312
TINCR	2.19808	0.311088	3.36115e-05	0.00495682
LOC339524	1.88375	3.23552	3.4159e-05	0.00500052
AP1M2	2.76447	0.973683	3.45552e-05	0.00502161
SLC44A4	2.89959	1.13646	3.5107e-05	0.00502838
AKNAD1	1.97503	1.02803	3.50801e-05	0.00502838
F13B	3.02217	-2.38211	3.78723e-05	0.00538572
AADAC	4.14051	0.1348	3.83376e-05	0.00539992
TSPAN1	2.05519	1.62984	4.00447e-05	0.00557517
LY6G6E	3.38461	-3.06197	4.12753e-05	0.00566724
VWA2	2.38393	1.16233	4.12343e-05	0.00566724
SCGB1A1	5.31325	5.37579	4.19208e-05	0.00571644
KRT15	3.54697	-1.24766	4.26592e-05	0.00577757
CEACAM5	4.46729	-0.535067	4.52349e-05	0.00608502
LOC643037	3.50102	-3.36399	4.72755e-05	0.00618736
TDRD5	3.35712	-1.16892	4.69626e-05	0.00618736
ZNF536	3.30818	1.35014	4.71298e-05	0.00618736
GGT3P	2.4285	-1.4365	4.68312e-05	0.00618736
SGPP2	1.97935	-0.143595	4.75496e-05	0.00618736
CRB3	3.3087	0.310275	4.84368e-05	0.00626187
RPRML	2.40797	-1.40874	5.00763e-05	0.00639083
FBXL7	-1.39065	5.36551	4.98209e-05	0.00639083
FBN1	-2.11252	8.92551	5.08055e-05	0.0064426
TMEM45B	1.795	-0.0621993	5.12787e-05	0.00646145
IL1RL1	3.49374	2.88866	5.29868e-05	0.00647187
GRHL2	3.36214	0.596836	5.25804e-05	0.00647187
LRRN4	3.06048	1.39285	5.2544e-05	0.00647187
PRSS50	1.92775	1.55408	5.22718e-05	0.00647187
LPAR1	-1.31827	5.81131	5.28712e-05	0.00647187
SAA4	5.11586	-2.28712	5.40015e-05	0.00655559
SULT2B1	2.68739	0.275089	5.67095e-05	0.00672041
KCNH8	2.61199	-0.574485	5.6704e-05	0.00672041
COL4A4	2.52819	3.6883	5.64778e-05	0.00672041
PARD6B	2.11146	1.78573	5.65479e-05	0.00672041
GFAP	-7.97907	5.96651	5.76095e-05	0.00678668
IYD	3.60003	-1.23798	5.88726e-05	0.00685435
APOBEC4	3.44482	-2.70043	5.88073e-05	0.00685435
ZBBX	3.79396	-1.42817	6.03208e-05	0.00687021
IDI2-AS1	1.83627	0.902265	6.03133e-05	0.00687021
CISH	1.40791	3.77904	5.94185e-05	0.00687021
CEND1	-3.38503	-0.229036	6.03891e-05	0.00687021
C20orf85	4.28255	-0.741944	6.18677e-05	0.00693254
VWA3A	2.4877	-0.0212034	6.16522e-05	0.00693254
DLL1	1.47946	4.02088	6.19816e-05	0.00693254
CLDN3	3.17246	-0.145136	6.32267e-05	0.00703229
HPGD	2.44316	4.61822	6.42201e-05	0.0071031
CAPN13	3.05615	0.150613	6.47198e-05	0.00711883
FAM81B	2.87657	-1.87045	6.52996e-05	0.00713069
DGCR6	1.76583	4.63221	6.5544e-05	0.00713069
DNAH5	2.43174	0.554587	6.64119e-05	0.00718584
FAM216B	3.28396	-0.382626	6.71758e-05	0.00722921
FLJ26245	4.26239	-0.503388	6.93856e-05	0.00727936
PTCHD3	3.57315	-0.832293	6.98356e-05	0.00727936
SLC13A5	3.0271	3.44335	6.86886e-05	0.00727936
TJP3	2.84828	0.249689	6.92222e-05	0.00727936
PLA2G1B	2.65949	0.0880854	6.95076e-05	0.00727936
CD5L	2.58642	-2.3525	6.91941e-05	0.00727936
PRSS46	2.05438	-0.686576	7.2028e-05	0.00746877
COL12A1	-1.96426	10.6368	7.36095e-05	0.00759322
SLC13A2	4.27512	-1.38761	7.68447e-05	0.0076495
CLDN18	3.54187	5.47055	7.65665e-05	0.0076495
P2RX5	2.91418	0.55214	7.65293e-05	0.0076495
AATK	1.74851	3.1046	7.5281e-05	0.0076495
LLGL2	1.68509	3.46634	7.6203e-05	0.0076495
TRPC4	-2.0545	2.18985	7.60747e-05	0.0076495
LRRC7	-3.95526	1.88008	7.63465e-05	0.0076495
EVI2A	-1.61946	5.46042	7.95532e-05	0.00787972
PDK4	2.80856	7.55375	8.1082e-05	0.00795202
SEC14L6	2.72236	-0.993639	8.08854e-05	0.00795202
LOC100144604	2.22744	-0.799399	8.24238e-05	0.00804399
RBP2	3.62475	-1.14264	8.35004e-05	0.00804622
SYTL1	1.8496	2.02588	8.40631e-05	0.00804622
TRIB1	1.55727	5.20978	8.30816e-05	0.00804622
RNF112	-3.29806	3.79655	8.40491e-05	0.00804622
GPRC5A	2.78818	5.00404	8.65736e-05	0.00820759
SFRP2	-2.89211	7.1411	8.64103e-05	0.00820759
TFDP3	4.06012	-0.987369	8.70235e-05	0.00821114
PTGER1	1.89275	0.316544	8.76379e-05	0.00823011
FAM163A	2.7484	-1.40877	8.98391e-05	0.00839721
XIRP1	4.49498	7.91311	9.14791e-05	0.00845951
SLC22A31	2.88797	2.94671	9.1333e-05	0.00845951
NWD1	2.60787	-0.168299	9.20624e-05	0.00845951
MMP23A	2.11178	-0.874568	9.22052e-05	0.00845951
VSIG2	2.24849	2.33139	9.37616e-05	0.00856284
ALPP	3.1808	-1.80118	9.44325e-05	0.0085733
PCDHGA11	-3.10178	2.55054	9.47374e-05	0.0085733
CALML6	3.81637	4.00123	9.8819e-05	0.00883221
IGFALS	2.12857	-1.12329	9.89293e-05	0.00883221
CACNA1D	1.98692	2.17153	9.88743e-05	0.00883221
IRX6	1.82797	2.76433	0.000100128	0.00889936
SERPINI1	1.41734	3.83499	0.00010072	0.00891216
LY6G6F	2.20244	-2.6821	0.000101291	0.00892303
PRSS8	3.26777	2.86529	0.000103402	0.00898969
TRIM10	2.41089	-2.94844	0.000102515	0.00898969
IRX5	1.46114	4.81879	0.000103349	0.00898969
GRID2IP	2.10106	0.431412	0.000104587	0.00905318
BSPRY	3.0186	-0.177869	0.000105672	0.00910746
SLC34A2	4.16381	6.96739	0.000108305	0.00929416
SLC6A4	3.61085	4.81711	0.000109272	0.00933441
TNR	3.14108	1.874	0.000109712	0.00933441
CLEC4M	3.75983	-0.474405	0.000110765	0.00938388
CAPN8	3.43577	0.747764	0.000116297	0.0098108
C4BPA	4.38866	4.33072	0.000118022	0.00991436
CXCL2	2.3661	3.65555	0.000118733	0.00992924
AIM1L	2.18621	-0.573328	0.000119197	0.00992924
LINC00551	3.0176	-1.13816	0.000125517	0.0103815
SLC1A1	2.11775	3.68918	0.000125668	0.0103815
INMT	3.06447	4.62444	0.000126748	0.0103949
EPHA10	2.07168	-1.32626	0.000126875	0.0103949
AK7	2.03443	-0.601872	0.000128761	0.0105061
IGLL5	2.80046	4.10118	0.000129988	0.010563
VEPH1	2.17103	2.73692	0.000132723	0.0107414
PCSK9	2.10412	2.3993	0.000134197	0.0108167
ABRA	4.546	4.35594	0.000135074	0.0108435
LINC00656	2.62098	-2.90884	0.000137237	0.010929
LOC440335	2.31454	-1.06483	0.000136805	0.010929
CACNA1B	2.70355	2.70626	0.000141305	0.0111601
GPA33	2.65142	-0.302858	0.00014182	0.0111601
GAS1	-1.69899	6.1419	0.000141132	0.0111601
CYP2F1	2.88661	-1.77802	0.000144378	0.0112345
SCNN1A	2.85695	3.33332	0.000144326	0.0112345
SULT1A2	2.09886	0.121106	0.000145024	0.0112345
MED12L	1.65903	1.96919	0.000144567	0.0112345
PIGR	4.03481	4.17133	0.00014603	0.0112687
CES1P2	2.66454	-3.18132	0.000149372	0.0114379
FAM92B	2.37273	-1.2471	0.000149081	0.0114379
WDR65	2.17579	-1.03956	0.000150331	0.0114672
TEPP	2.33354	-1.90749	0.000154175	0.0117155
CHRNA2	2.91085	-2.90341	0.000155958	0.0117169
C10orf67	2.66413	-0.625074	0.00015538	0.0117169
C1orf194	2.30723	-1.43207	0.000155157	0.0117169
TAS2R42	3.89825	-2.84385	0.000159443	0.0119336
LOXL4	1.83756	5.38258	0.000161342	0.0120305
INPP5J	1.93303	0.292144	0.00016228	0.0120477
FAAH	1.33887	3.54861	0.000162782	0.0120477
NAPSA	3.48733	6.06553	0.000164915	0.0121155
HES2	2.30016	2.24942	0.000164844	0.0121155
HSD17B6	2.30206	3.15974	0.000169436	0.0124018
VSX2	2.62738	-3.16781	0.000170731	0.0124054
CITED4	2.04494	3.3061	0.000170218	0.0124054
TTTY16	4.28607	-3.51914	0.000171658	0.0124274
SNAI3	2.00674	1.59556	0.000173454	0.0125119
IGJ	2.85224	4.63259	0.000175013	0.012559
KLF15	1.99257	2.04253	0.000175368	0.012559
HOPX	2.22746	4.41541	0.0001761	0.0125662
EPHA8	3.25496	-0.303424	0.000180033	0.0127102
ATP13A4	3.19082	2.63724	0.000178959	0.0127102
DLEC1	1.78172	1.0322	0.000179554	0.0127102
C6orf223	2.1858	0.365977	0.000180927	0.0127282
KRT8	2.36716	4.18759	0.000182318	0.0127612
CDH8	2.19744	0.522597	0.000182679	0.0127612
SNTN	3.88967	-0.996599	0.000183725	0.0127894
CALHM2	-1.1834	5.25357	0.000184426	0.0127935
SAGE1	-5.58551	-0.00721816	0.000185114	0.0127967
ACADL	2.42876	2.37267	0.00018891	0.0130139
ITIH4	2.64488	5.84096	0.00019153	0.0131489
FXYD3	2.73562	2.36067	0.000192612	0.0131777
DDC	2.69749	-1.98109	0.000196581	0.0133574
SLC51B	1.87894	0.226418	0.000196498	0.0133574
B4GALNT2	3.02366	-2.8839	0.000202756	0.0137301
BEX2	2.46325	1.32353	0.000208293	0.0140573
GAL3ST4	-1.39725	4.5214	0.000218636	0.0147055
COL6A5	3.52413	1.17924	0.000220106	0.0147111
FMO5	1.60281	2.87271	0.000220197	0.0147111
VEGFC	-1.34944	4.20736	0.000220965	0.014713
NDST3	-3.38445	1.69346	0.000223075	0.014804
CLDN2	2.6462	-0.74134	0.000225755	0.0148827
LRRK2	2.15872	5.29581	0.000225643	0.0148827
COL4A3	2.56322	3.87434	0.000227819	0.0149242
GRB7	2.33911	1.04221	0.000228634	0.0149242
HIST1H2AE	-2.5001	-0.282905	0.000228378	0.0149242
THY1	-1.87735	8.53195	0.00023053	0.0149988
FCN2	2.79423	-1.9788	0.000232556	0.0150813
STARD10	1.33174	4.53643	0.000234645	0.0151673
DENND1B	1.04092	4.7138	0.000236917	0.0152154
KIF5C	-2.84206	3.45208	0.000236264	0.0152154
TMEM238	1.77088	-0.445505	0.00023951	0.0153325
CGN	2.81597	3.21427	0.000240768	0.0153636
SEC14L3	3.6824	-2.45461	0.000242125	0.0154009
LOC100506013	-3.03881	1.22368	0.000247353	0.0156833
PRR15L	3.39971	1.19777	0.00024854	0.015689
PLIN1	-3.46889	2.41465	0.000249019	0.015689
CPB2	3.07531	1.29899	0.000250204	0.0157139
SULF2	-2.16803	6.71183	0.000251185	0.0157259
LSR	1.55265	3.44504	0.000253122	0.0157975
GPRIN2	3.66559	1.12718	0.000254108	0.0158095
CHRM1	2.95005	-0.2704	0.000255968	0.0158756
CNKSR1	2.2499	3.23095	0.000264332	0.0163435
HNRNPA1P33	2.9414	-0.786627	0.000266348	0.0164171
FRMPD2	2.39488	-2.74546	0.000268618	0.0165059
PROKR2	3.73564	-3.04007	0.000275428	0.0167691
FA2H	2.59806	-1.55346	0.000274963	0.0167691
UNC5C	-1.8766	4.94546	0.000274027	0.0167691
KRT81	-4.41773	1.83275	0.000277433	0.0168397
ZNF750	1.8622	-0.510909	0.00028005	0.0169468
RAB25	3.09492	1.3574	0.000283406	0.0170478
ASPA	2.3943	1.68405	0.000283431	0.0170478
PRSS22	2.62519	-0.646745	0.000290806	0.0173343
MEGF11	2.05148	0.0259957	0.000289931	0.0173343
SYN2	1.86857	1.39984	0.00029022	0.0173343
SCGB3A1	2.83801	3.17838	0.000293088	0.0173663
FBP1	1.99169	3.4072	0.000292218	0.0173663
C1orf116	3.54028	4.34901	0.000297129	0.0175016
TMEM51-AS1	1.70812	-0.20374	0.000296429	0.0175016
KCNG3	2.28795	-0.573751	0.000298985	0.0175073
MT1A	2.11133	0.593557	0.000298564	0.0175073
TNMD	-7.16951	5.92673	0.000302397	0.0176552
NR0B2	2.96612	-1.47016	0.000310553	0.0180784
ANKRD1	3.57228	7.00319	0.000313988	0.0181341
HNF1B	3.21011	0.592601	0.000317168	0.0181341
FGF23	2.93004	-1.43442	0.000314951	0.0181341
MIR614	2.83925	0.544866	0.000317886	0.0181341
TMPRSS13	2.13942	0.275102	0.000317145	0.0181341
USP54	1.40443	4.64446	0.000316589	0.0181341
ST8SIA4	-1.58402	5.10132	0.000313895	0.0181341
SEC14L4	2.86663	-0.296832	0.000329533	0.0187081
FAM83E	2.73335	0.190673	0.000329828	0.0187081
FXYD1	2.0442	5.52188	0.000338796	0.0190977
KL	1.52178	2.27667	0.000337927	0.0190977
NEFL	-4.34991	1.69078	0.000339575	0.0190977
LOC283299	2.79639	-2.37829	0.000340923	0.0191195
MT1X	1.91971	6.35737	0.000343938	0.0191882
RPE65	-5.57059	1.11409	0.000344074	0.0191882
MFSD4	1.78813	1.37151	0.000345592	0.019219
TEKT1	4.09849	-1.53857	0.000352995	0.019576
LOC643441	3.65155	-1.88158	0.000357905	0.0197931
DSPP	2.60514	-1.93254	0.000361236	0.0199046
SMIM5	1.82185	1.59189	0.00036192	0.0199046
KCTD8	2.92393	-1.72933	0.000365609	0.0199512
C2orf40	2.20306	1.42256	0.000364093	0.0199512
SPINT2	1.72993	4.34181	0.000365775	0.0199512
STX19	2.31379	-1.30459	0.000370486	0.020153
C1orf172	3.22042	-0.875828	0.000378174	0.0205152
PPP1R27	4.28749	5.8744	0.00038004	0.0205604
FAM46D	3.5584	-2.90043	0.000381787	0.0205989
INADL	1.37005	4.76705	0.000383149	0.0206165
DSG3	-4.52103	1.07252	0.00038494	0.0206571
LRP2	2.70217	1.02041	0.000386458	0.0206828
SOWAHB	2.19311	-1.19099	0.000389438	0.0207864
RNF144B	1.58428	5.34526	0.000394199	0.0209843
EVPL	2.69869	2.50867	0.000402895	0.0213311
RS1	1.90194	-0.7421	0.00040393	0.0213311
EDNRB	1.63136	5.06176	0.000403662	0.0213311
TEKT2	1.64817	-0.249067	0.000407751	0.021476
FMO2	3.0301	4.97807	0.000409119	0.0214911
LAMC3	1.84606	4.54253	0.000410899	0.0215279
DKFZp686D0853	-6.19324	3.38081	0.000413	0.0215811
CLEC3A	-6.30132	2.71478	0.000414863	0.0216217
GRIA3	-2.56655	2.51898	0.00041817	0.0217372
C11orf35	1.77946	1.94538	0.00042124	0.0218397
ASZ1	2.85823	-3.34112	0.000426636	0.022062
PCDHA11	3.0823	-0.954501	0.000429658	0.0221608
SCNN1B	3.133	1.89412	0.000433991	0.0223264
SFRP4	-2.67619	8.39349	0.000439749	0.0225643
C6orf25	1.8443	-1.2165	0.000442755	0.0226602
PRKCZ	1.92954	2.4712	0.000444971	0.0227152
RAB11FIP1	1.563	5.97069	0.000448704	0.0228472
FAM183A	2.9466	-1.47149	0.000451631	0.0229074
GPR1	-2.01878	2.94453	0.000452189	0.0229074
OCLN	2.56618	1.9021	0.000455856	0.0230346
MYOC	3.69288	1.51092	0.000458366	0.0231028
SLC16A11	1.71204	-0.0668404	0.000462289	0.0232417
SCN7A	3.52039	3.79134	0.000472721	0.0234852
C1orf210	3.42976	-0.476108	0.000472351	0.0234852
CLNK	2.07632	-2.5951	0.000473031	0.0234852
IZUMO1	1.87758	-1.13886	0.000469354	0.0234852
ZDHHC15	1.81224	0.986337	0.000470408	0.0234852
TAL2	2.34851	-0.785027	0.000476194	0.0235834
CYP2G1P	2.3825	-2.884	0.000483824	0.0238427
ADAMTS17	1.6605	2.98248	0.000483664	0.0238427
KCNA4	2.84552	-0.295312	0.000498299	0.0244351
EPHA3	-2.09546	6.61479	0.000497469	0.0244351
SHANK2	2.42324	1.61734	0.000504469	0.0246163
DNAJB13	1.91888	-1.34071	0.000504262	0.0246163
WDR38	2.31066	-1.62553	0.000508697	0.024762
EPS8L3	3.22467	-2.00855	0.000511653	0.0248451
MIR29C	2.65319	-0.0280633	0.000514876	0.0248942
MAOA	1.62132	5.21982	0.000515164	0.0248942
ZBTB42	1.00473	3.06934	0.000519042	0.0250208
FNDC1	-1.90806	7.85705	0.000525949	0.0252926
LNX1	1.37265	4.26634	0.00053066	0.0254576
NME9	1.56596	-0.730536	0.000534439	0.0255773
WDR16	2.26559	-1.32452	0.000540589	0.0256864
MYZAP	2.12984	2.18846	0.000540294	0.0256864
CTNND2	-3.36911	3.12188	0.000538169	0.0256864
DTHD1	2.73001	-1.51513	0.000542157	0.0256995
TMIE	1.65483	2.33862	0.000543616	0.0257075
THBD	1.41669	6.71084	0.000545494	0.0257352
PRDM11	1.15101	3.31009	0.000556002	0.0261689
ICAM4	1.96381	0.724942	0.000566534	0.0265404
CCDC144NL	-3.54869	-0.0770472	0.000566562	0.0265404
SCGB3A2	3.40437	2.8377	0.000567939	0.0265425
SMIM6	2.20344	-2.27546	0.000577418	0.0268594
RAB17	1.92361	1.68548	0.000577275	0.0268594
SCGB2A1	2.89668	-3.48644	0.000582018	0.0269474
LINC00460	-3.2192	-1.47018	0.000581454	0.0269474
IL17RB	1.47683	3.77119	0.000583674	0.0269614
RSPH1	1.95934	-0.630279	0.000586187	0.0270148
FABP6	2.18879	-1.42093	0.000589222	0.027092
CNTFR	1.96728	2.77388	0.000599663	0.0275085
GFRA2	1.48602	1.58455	0.000606813	0.0277725
VGLL1	3.64244	-1.84687	0.000612931	0.0279509
CCL17	1.92563	-1.17896	0.000613519	0.0279509
ABCA3	2.21322	5.63683	0.000618509	0.0280499
HTR1B	-4.69929	0.707267	0.000617654	0.0280499
PAQR5	1.62317	1.95275	0.000625275	0.0282923
C11orf16	1.84754	-1.71991	0.000629524	0.0283557
BPIFB4	-3.36348	1.68247	0.000629256	0.0283557
TC2N	1.81821	2.94153	0.000631868	0.028397
HTR2A	-2.182	1.26891	0.000638709	0.0286398
FIGF	3.4321	0.0782697	0.000641836	0.0286509
VIPR1	2.95343	4.33256	0.0006405	0.0286509
HBEGF	1.39377	4.94036	0.000644342	0.0286984
SAMD12	2.23251	1.30149	0.00064765	0.0287814
HIST3H2A	-2.64822	2.2024	0.00065116	0.0288729
PTGFR	-2.07827	5.50462	0.000663479	0.0292887
MYO5C	1.50697	3.81219	0.00066848	0.0294442
KRT7	2.69051	4.47766	0.000678243	0.0295474
CHST4	2.52516	-3.05269	0.000676649	0.0295474
KLRG2	2.42971	-0.959035	0.00067671	0.0295474
GJB6	2.27458	-1.59595	0.000675782	0.0295474
CYP3A5	1.66184	1.15263	0.000678222	0.0295474
SFTPB	3.6965	9.02546	0.000690646	0.0299278
BCRP3	1.96612	-1.25966	0.000691486	0.0299278
USP44	1.73113	0.406942	0.000691133	0.0299278
MAP3K19	2.10786	-1.79108	0.000707819	0.0305683
AQP2	2.69816	-2.79881	0.00071645	0.0308074
CPAMD8	1.86756	2.5397	0.000716431	0.0308074
KLK11	3.10722	0.0120442	0.000730185	0.0311645
CDH22	2.109	-1.54223	0.000730855	0.0311645
KIRREL3	1.91426	0.283651	0.000732581	0.0311645
ZNF385B	1.79849	2.97313	0.0007317	0.0311645
MEP1A	-4.73566	-0.240738	0.000731835	0.0311645
FAM155A	-2.13909	2.16075	0.000736517	0.0312651
CAMSAP3	2.644	0.895257	0.000745358	0.031573
LCN2	2.46247	-0.892441	0.000751592	0.0317695
ALDH1L1-AS2	3.70766	-1.08758	0.000758442	0.031902
APOH	3.1179	-1.72761	0.000760565	0.031902
LGALS17A	3.05211	-0.64543	0.000760598	0.031902
C15orf56	2.04126	-1.43478	0.000761135	0.031902
ADRB1	2.55618	1.31434	0.000770323	0.0322192
PVT1	1.61517	3.83601	0.000773687	0.0322921
ACTG2	-4.096	6.67467	0.000785723	0.0327259
VCAN	-1.52628	9.03648	0.000796472	0.0330353
OTOA	-1.89996	-0.375222	0.000794942	0.0330353
CYP2B7P1	3.20161	2.39516	0.000799284	0.033083
GOLT1A	3.7087	-1.40097	0.000816729	0.0335263
HHLA2	2.81495	-1.71854	0.000813072	0.0335263
DPP6	2.68331	0.65058	0.000816525	0.0335263
WDR96	1.61242	0.183898	0.000813704	0.0335263
ADH7	2.7559	-3.429	0.000823371	0.0337294
SDPR	1.96855	5.26782	0.000831538	0.0339239
KIAA0319	1.957	0.261427	0.000833232	0.0339239
LRRC15	-1.92227	8.90167	0.000831067	0.0339239
PLA2G4F	3.23264	2.76698	0.000842664	0.0341642
ADH1B	3.22236	5.68931	0.000845997	0.0341642
ALDH1L1-AS1	2.46601	-2.74545	0.000845189	0.0341642
PFKFB2	1.03693	4.27733	0.000843592	0.0341642
MAP3K15	1.87867	-0.522403	0.000850508	0.0342769
DCAF4L2	-4.92806	-0.618998	0.000852676	0.0342948
AQP5	2.21796	0.157317	0.000858337	0.0343306
EMILIN3	1.8116	2.57588	0.000857232	0.0343306
MT1H	-3.36036	0.873133	0.00085874	0.0343306
MUC16	1.91476	-1.5825	0.000861873	0.0343868
MLNR	2.19517	-2.35826	0.000865845	0.0344762
KIAA1804	1.78984	1.18876	0.000868652	0.034519
CD160	1.51874	0.945569	0.000875385	0.0347172
LOC646736	4.00976	-0.599015	0.000899254	0.0355223
HABP2	2.63386	-1.53542	0.000897538	0.0355223
CACNB1	1.97676	5.81901	0.000905081	0.0356112
PLS1	1.75932	2.73301	0.000904991	0.0356112
MUC4	1.83133	-0.145375	0.000907713	0.0356279
DDR1	1.17168	5.15004	0.000909086	0.0356279
FAM65C	1.62804	3.55665	0.00091616	0.0358346
GFI1	1.46321	1.3335	0.000919016	0.0358759
PKP3	1.92145	1.83718	0.00092418	0.0360069
ALOX15B	2.32864	1.73186	0.000930449	0.0361803
CST7	1.492	1.86387	0.000943947	0.0366336
COL8A1	-1.98632	5.70659	0.000951872	0.0367977
SPINK6	-4.65558	-0.38382	0.000954856	0.0368415
GJB1	2.77625	-1.86824	0.000966025	0.0371285
KCTD19	1.76785	0.0436843	0.000965935	0.0371285
CES1	2.60668	4.18079	0.000968632	0.037157
GLIPR1	-1.14069	5.42113	0.000973472	0.0372709
ACSM1	2.44837	-2.08167	0.000980413	0.0374584
RNASE2	-2.16892	-0.0891745	0.000982132	0.0374584
VENTXP1	3.71355	-2.92237	0.000985392	0.0375013
TMEM213	2.73095	-2.98475	0.00098759	0.0375013
CLVS2	2.54939	-2.84768	0.000989492	0.0375013
LOC200772	1.86405	-1.11524	0.000993432	0.0375013
XCL1	1.57566	-0.136852	0.000992323	0.0375013
STX11	1.39139	2.92916	0.000994704	0.0375013
SCG2	-2.72499	3.04148	0.000998326	0.0375013
DSC1	-5.19655	1.89678	0.000997681	0.0375013
WNT3A	2.60356	-0.16503	0.0010063	0.0375664
CCDC64B	2.45483	0.22173	0.00100761	0.0375664
MIR1204	2.20544	-1.80813	0.00100432	0.0375664
SERPINA1	1.83938	6.03556	0.00100229	0.0375664
FGFBP1	3.33157	-2.60745	0.00101025	0.0375946
LOC100499227	1.59743	0.32432	0.00101748	0.0377929
KCNA3	2.22776	-0.030484	0.00102985	0.0381811
EPB41L5	1.10616	4.8438	0.0010359	0.0382631
KIAA1644	-2.00576	3.80346	0.0010347	0.0382631
B3GNT6	2.36298	-2.93599	0.00104432	0.0385027
FLJ23867	1.27754	3.115	0.00104893	0.0386011
MIRLET7A1	2.43763	-3.41814	0.00105229	0.0386532
HS3ST2	-1.97896	2.96701	0.00105656	0.0387386
COL3A1	-2.00674	13.5229	0.0010616	0.0388057
LOC285629	-5.33343	-0.962074	0.00106229	0.0388057
TYRP1	2.7519	0.503623	0.00106577	0.0388617
ARX	2.35534	2.28435	0.00107613	0.0391677
TMPRSS2	3.01996	2.84931	0.001083	0.0393456
WIPF3	2.36937	2.4296	0.00108841	0.0394087
FREM3	2.14507	-1.42387	0.00108869	0.0394087
NFE2	1.61279	0.743471	0.00109722	0.0395734
SYT11	-1.1627	5.65895	0.00109721	0.0395734
ST6GAL2	-2.66155	4.57031	0.00110491	0.0397788
GATA5	2.4503	-0.165572	0.00110833	0.0398229
ANO9	1.73988	1.62149	0.00111014	0.0398229
C1orf87	2.72404	-1.16562	0.00113223	0.0404617
LAMA3	2.03285	4.95061	0.00113556	0.0404617
LOC284080	1.98322	-0.997091	0.00113503	0.0404617
LOC645166	-1.54604	2.84731	0.00113607	0.0404617
TTC39A	1.5037	1.81538	0.00114129	0.0405749
C22orf15	1.7557	-2.02503	0.00116803	0.0414516
EPHA1	1.9322	0.157486	0.00117778	0.041723
MIDN	1.14445	6.81397	0.00118056	0.0417475
PLA2G12B	2.58991	-2.34656	0.00118983	0.0417905
FOLR2	-1.4646	5.48335	0.00119018	0.0417905
MYH13	-3.30287	-0.770152	0.00118705	0.0417905
CCDC114	1.60119	0.192629	0.00119895	0.0419535
HIST1H2BG	-2.39622	-0.0816016	0.00119903	0.0419535
JAKMIP2	-2.21083	4.12834	0.00120282	0.0420121
PGC	3.70212	4.335	0.0012076	0.0420223
TMEM125	3.29359	3.0347	0.00121155	0.0420223
IL5RA	2.28458	-0.644374	0.00120789	0.0420223
BASP1	-1.896	6.95711	0.00121128	0.0420223
CCDC135	1.79516	-2.02725	0.00121608	0.0421059
MMP8	-4.1131	0.917574	0.0012503	0.0432156
CWH43	3.72518	-2.47493	0.00126147	0.0434863
NLRP4	2.54847	-1.80008	0.00126256	0.0434863
TRPV2	-1.60894	5.85381	0.00126468	0.0434863
DEGS2	1.70816	-0.854301	0.00126791	0.0434967
GALR3	1.6327	-1.72876	0.00126936	0.0434967
PDZK1IP1	2.69256	0.882874	0.0012779	0.0436467
PRSS16	2.42404	0.616873	0.00127863	0.0436467
PTGS2	1.49152	3.71088	0.0012825	0.0436467
ATP5EP2	-1.5321	3.3057	0.00128142	0.0436467
IER2	1.02638	7.33551	0.00128514	0.0436618
ST3GAL1	1.19055	7.24287	0.00129238	0.0438329
ARAP2	1.71234	2.99962	0.00129793	0.0439463
OR51E1	-2.41909	1.14564	0.00130284	0.0440379
C21orf7	1.44733	3.30485	0.00131182	0.0442661
ST6GALNAC1	1.89915	-0.242149	0.00133794	0.0450618
UBXN10	1.70667	0.534315	0.00133992	0.0450618
TTC22	2.4501	-0.976151	0.00134357	0.0451082
ALDOC	1.42863	3.82468	0.0013496	0.0452345
MYRF	1.56831	4.42761	0.00135286	0.0452674
VGLL2	3.36622	4.08024	0.0013589	0.0453171
TCF21	3.08452	3.1024	0.00135802	0.0453171
SFTPC	3.7305	9.86666	0.00137667	0.0458329
ENPP1	-2.32356	7.31244	0.00137948	0.0458497
PAK6	1.40544	1.23964	0.00139209	0.046192
PIANP	-2.0035	1.34227	0.00139463	0.0461992
SFTA3	3.57137	3.43082	0.00140122	0.0462761
LHFPL3-AS2	3.0804	0.0546476	0.0014016	0.0462761
TNFRSF17	2.45435	-1.93385	0.00140648	0.0463603
EPCAM	2.27662	3.80865	0.00141174	0.0464568
FAM71A	2.64904	-1.65088	0.00141545	0.0465021
THEGL	1.95611	-1.79446	0.00141844	0.0465236
BPI	-3.38154	1.32384	0.00142979	0.0468187
SLC6A16	1.23903	0.941318	0.00143223	0.0468214
CCDC60	2.37528	-2.76958	0.00143489	0.0468315
CDRT15P1	-2.32331	1.01152	0.00144597	0.0471159
SLC26A9	2.06939	0.40643	0.00145891	0.0473823
NRTN	2.02376	0.422932	0.00145676	0.0473823
MS4A15	2.50534	1.74278	0.00146807	0.0475433
MORC1	-3.54526	-1.21479	0.00146864	0.0475433
ATP2C2	2.03257	1.35867	0.00147247	0.04759
ERP27	1.88891	0.789977	0.00148568	0.0479392
KRT19	2.8912	3.76227	0.00149143	0.0480466
KIR2DS2	2.70502	-3.51149	0.00149726	0.0481565
CASS4	1.68692	1.78059	0.0015004	0.0481799
GPNMB	-1.21579	8.50799	0.00151517	0.0485759
KLF14	2.43095	-0.836041	0.00152228	0.0486622
IL12RB2	1.69864	2.29633	0.00152447	0.0486622
RCBTB2	-1.20589	4.89594	0.0015252	0.0486622
ROPN1L	1.71021	-1.30762	0.0015352	0.0486692
PLEKHH2	1.26225	4.2394	0.00153469	0.0486692
ETS2	1.14069	6.63625	0.00153188	0.0486692
EVPLL	2.41984	-1.10036	0.00154568	0.0489237
CADM4	1.68492	3.07424	0.00154884	0.0489458
GRM1	-2.79099	1.41256	0.00156567	0.0493994
ABCC6P1	2.06021	-1.10764	0.0015717	0.049511
WNT7A	3.39451	-0.780056	0.00158319	0.0497943
